# Supplementary material for: Biomass Burning Aerosol as a Modulator of Droplet Number in the Southeast Atlantic Region
Source: Copernicus journal article supplement (doi:10.5194/acp-2019-791), 2019-09-05
Supplement: Supplementary file [file acp-2019-791-supplement.pdf]

1 **Supplemental Information**

2

3 **Figure S1:** Comparison of aerosol hygroscopicity from both UHSAS and CCN  
4 measurements ( $\kappa_{CCN}$ ) and AMS bulk chemical composition ( $\kappa_{AMS}$ ).

5

6 **Figure S2:** Predicted droplet number ( $N_d$ ;  $\text{cm}^{-3}$ ) versus measured  $N_d$  ( $\text{cm}^{-3}$ ) for all flights  
7 used in this work for which  $w^*$  was available (Table 1). Error bars in the  $N_d$  reflect the range  
8 of observed  $N_d$ , while the predicted  $N_d$  variability corresponds to one standard variation of  
9 the observed size distribution during each flight – when propagated through the droplet  
10 parameterization.

11

12 **Figure S3:** Predicted droplet number ( $N_d$ ;  $\text{cm}^{-3}$ ) plotted against measured aerosol number  
13 ( $N_a$ ;  $\text{cm}^{-3}$ ) for the entire flight of RF03.  $N_d$  levels off above  $N_a \approx 1000 \text{ cm}^{-3}$ , which is where  
14 we derive  $N_d^{lim}$ .

15

16 **Figure S4:** Predicted maximum supersaturation (%) as a function droplet number ( $N_d$ ;  $\text{cm}^{-3}$ )  
17 plotted against measured aerosol number ( $N_a$ ;  $\text{cm}^{-3}$ ) for all flights used in this work.

18

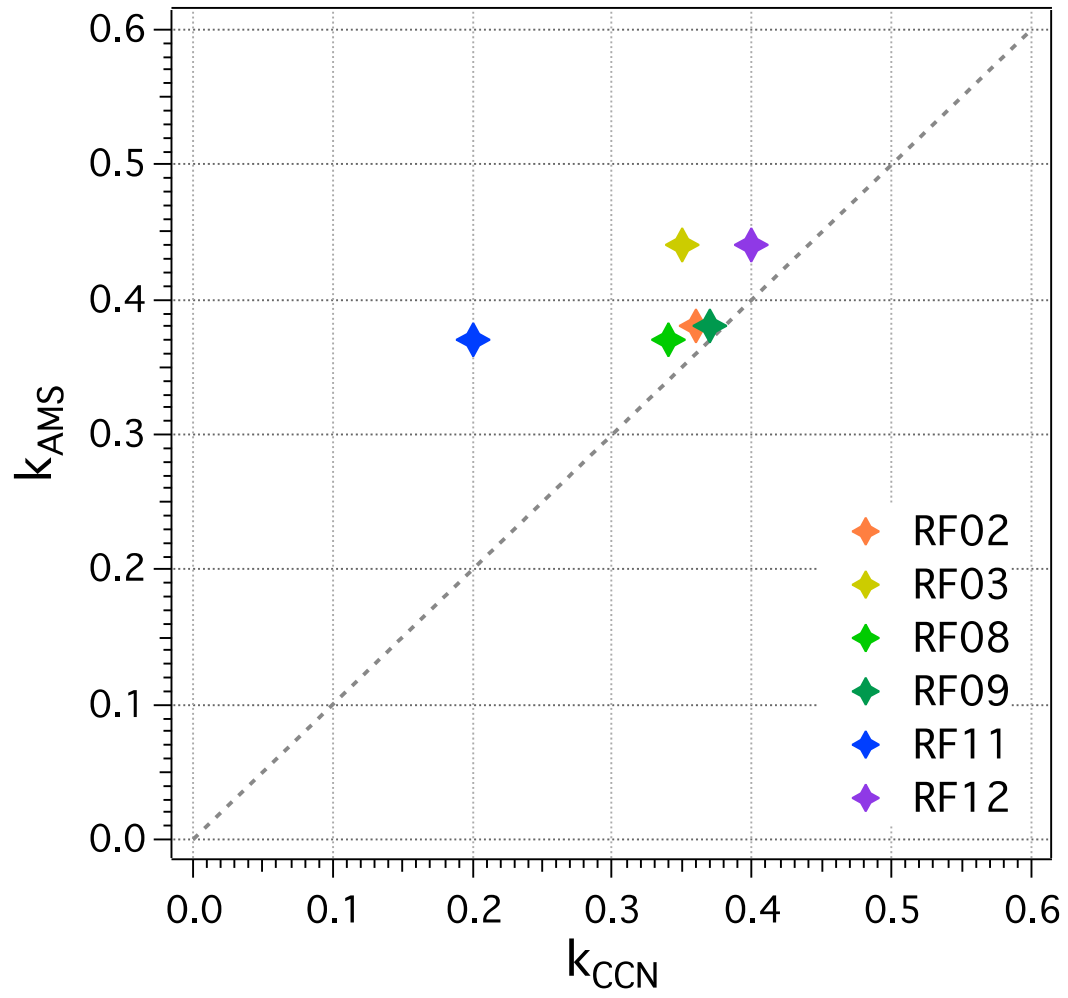

19

20

21 **Figure S1**

22

23

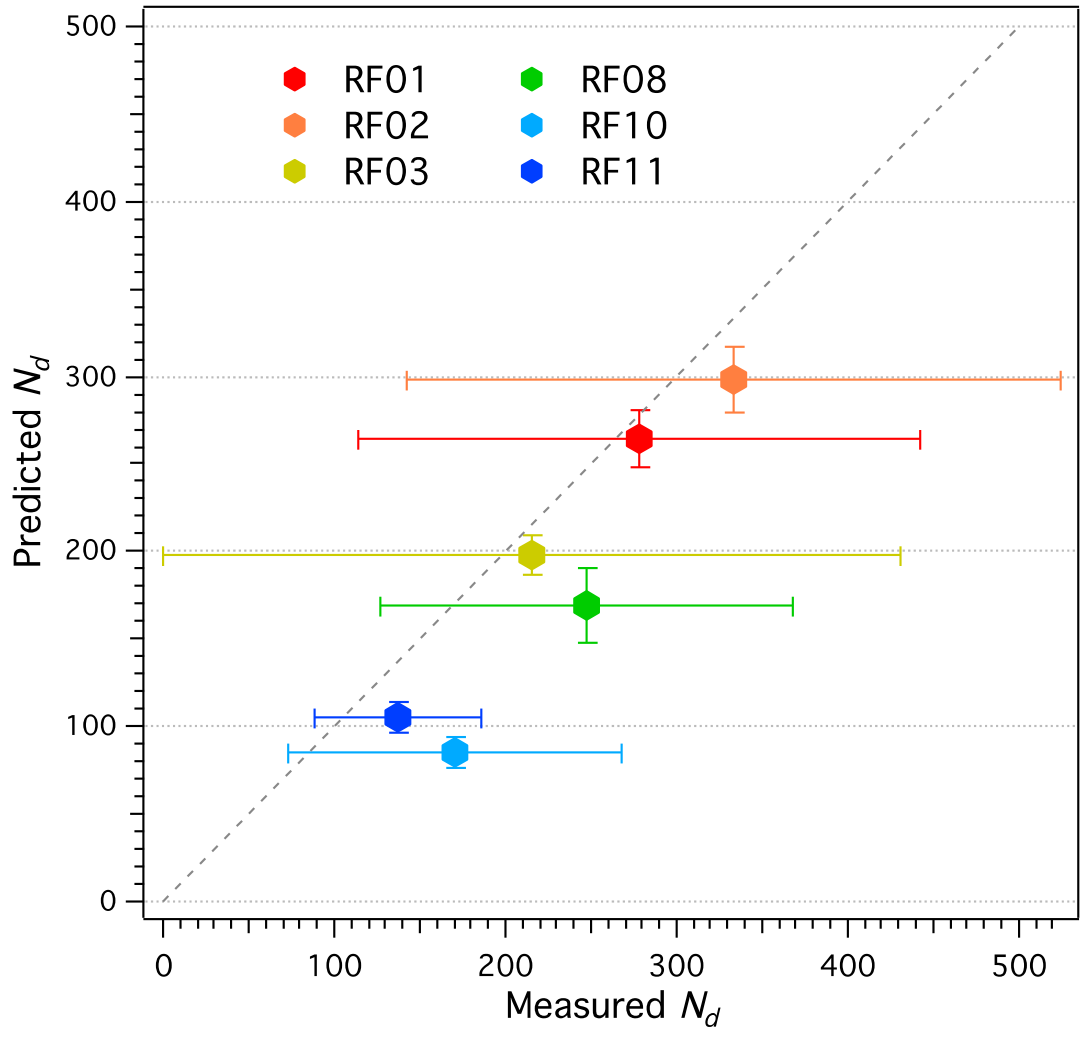

24

25

26 **Figure S2**

27

28

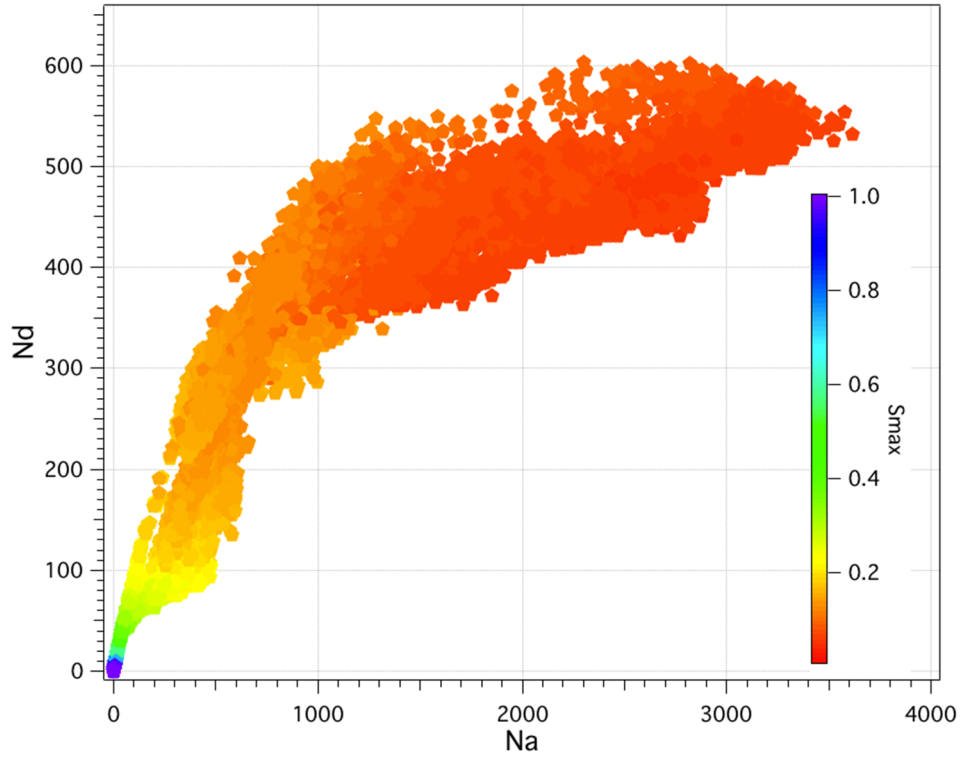

29  
30  
31  
32  
33  
34  
35

**Figure S3**

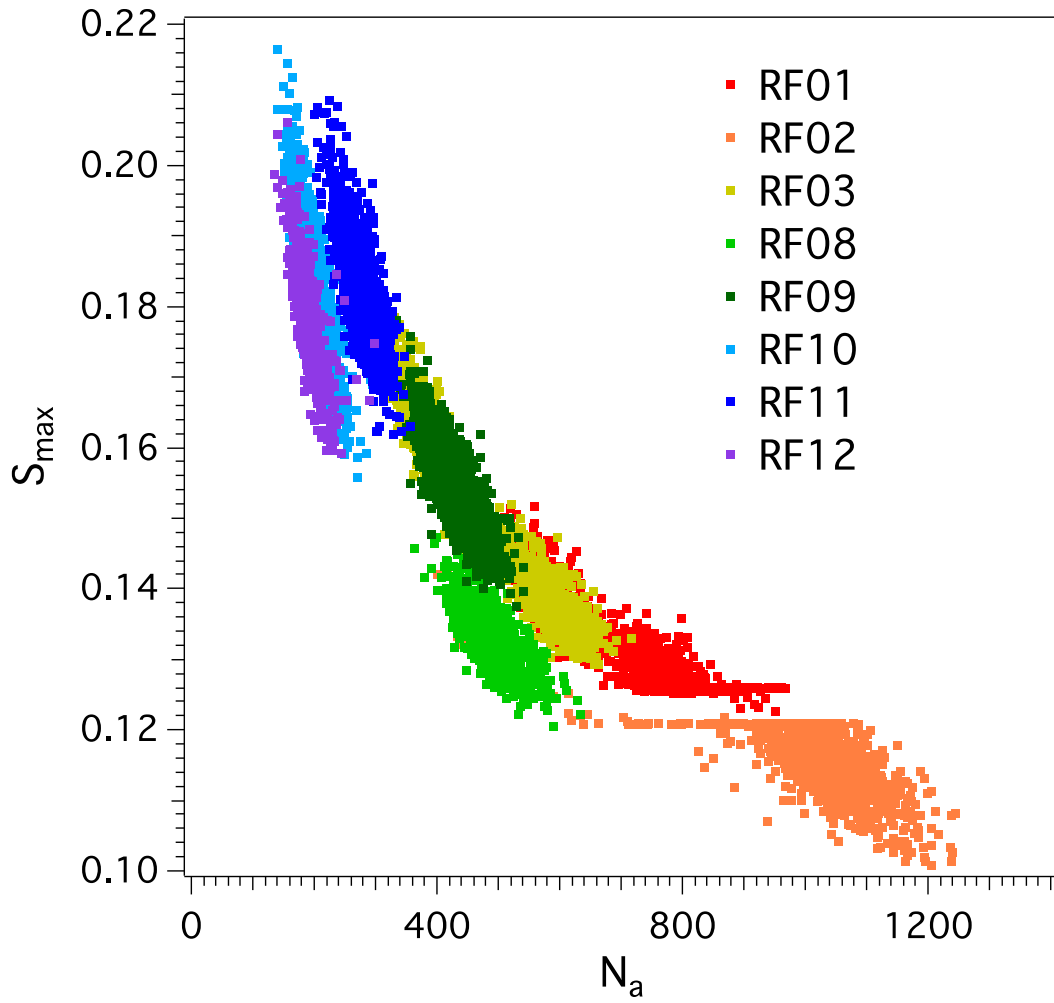

36

37

38 **Figure S4**

39
